# Supplementary material
Source: Springer Nature journal article supplement (https://www.springermedizin.de/resource/supplementary/13256_2011_1715_MOESM2_ESM.pdf/9648292)

Ex: 19690  
Se: 3  
XY 1262.75  
Im: 47+C

DFOV 42.9cm  
STND

R  
2  
1  
6

GSE:ql

L  
2  
1  
3

kV 120  
mA 441  
Noise Index: 10.0  
Large  
7.500mm/22.50 1.5:1  
Tilt: 0.0  
0.8s /HE 18:53:01/12.27  
W:400 L:40

P 214

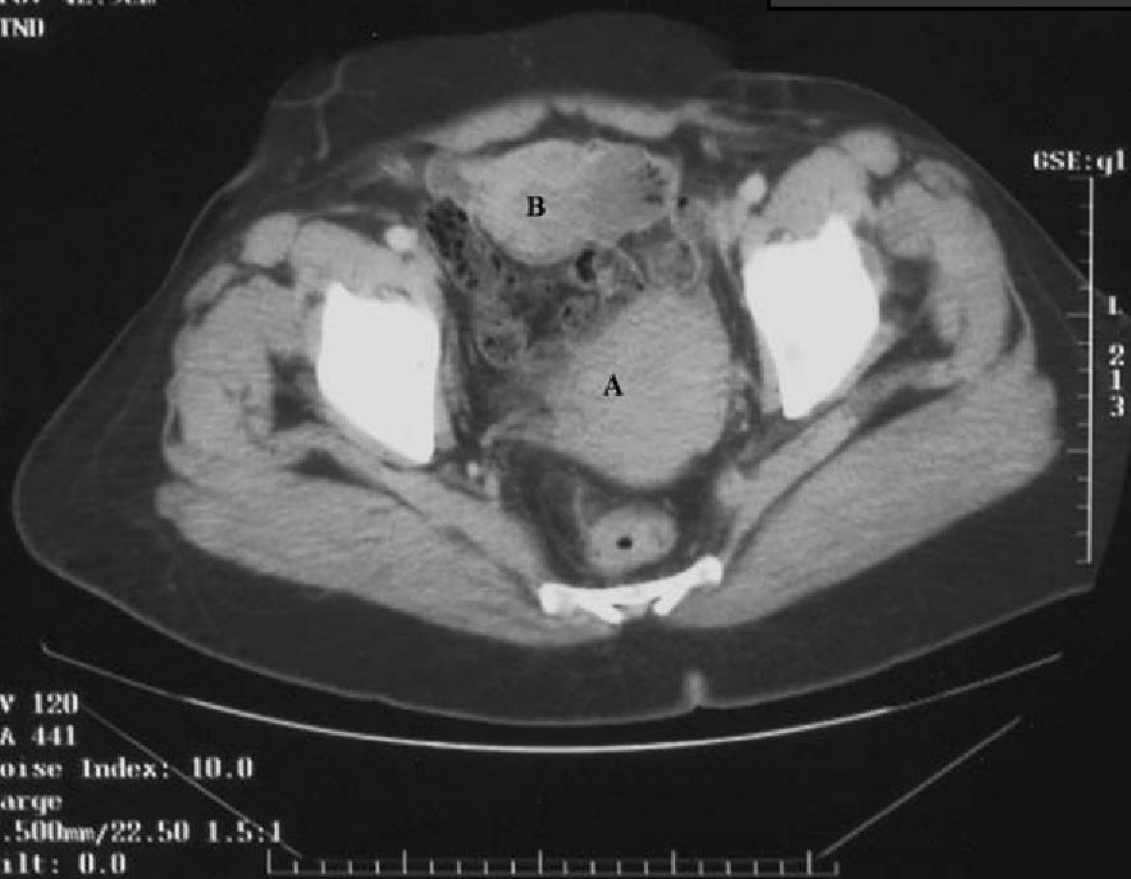

Supplement: MOESM2 [file 9648292]
